# Supplementary material
Source: Springer Nature journal article supplement (https://www.springermedizin.de/resource/supplementary/12865_2008_204_MOESM2_ESM.pdf/9428734)

**Cytokine 1, 3 comp's, n=200**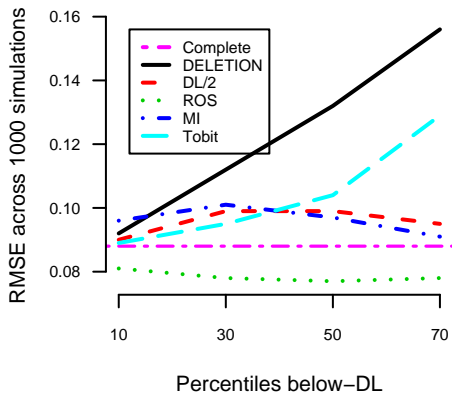**Cytokine 2, 3 comp's, n=200**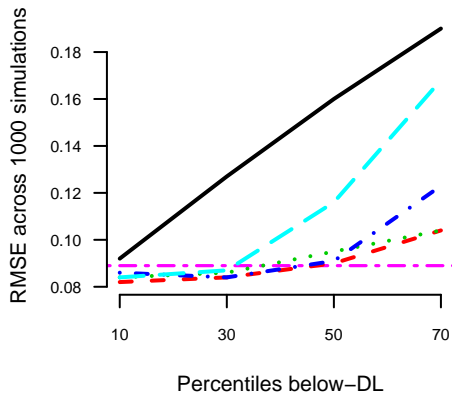**Cytokine 2, 3 comp's, n=400**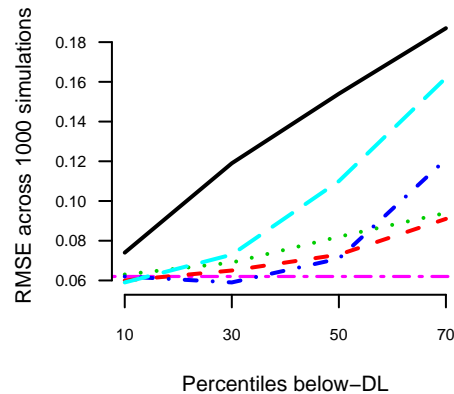**Cytokine 2, 3 comp's, n=1000**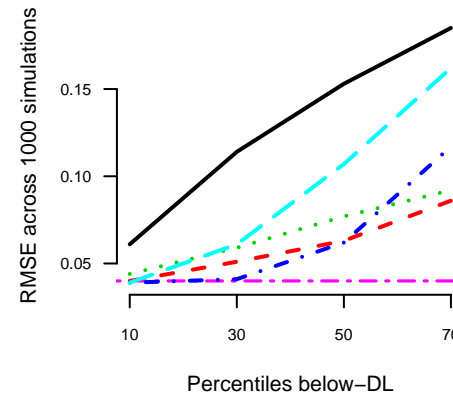**Cytokine 1, 2 comp's, n=200**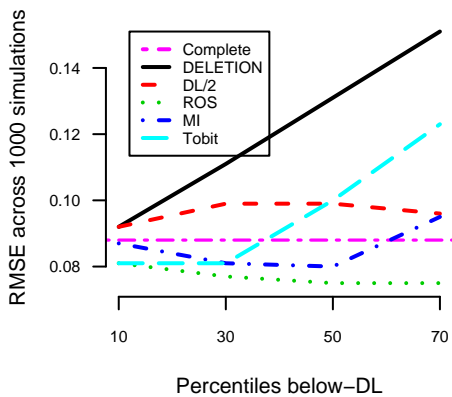**Cytokine 2, 2 comp's, n=200**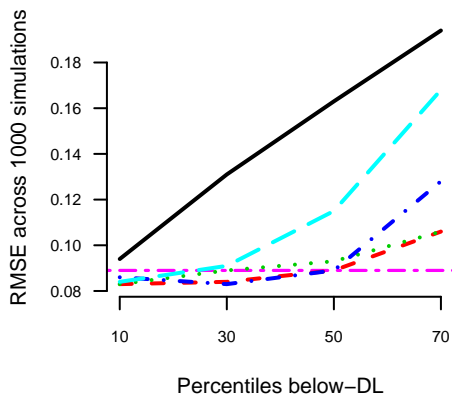**Cytokine 2, 2 comp's, n=400**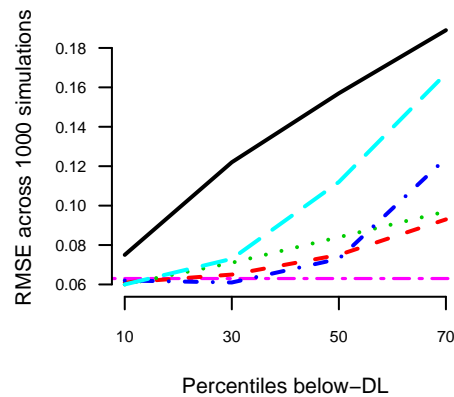**Cytokine 2, 2 comp's, n=1000**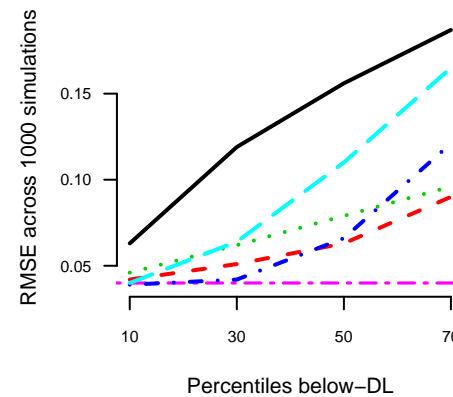**Cytokine 1, 3rd cat, n=200**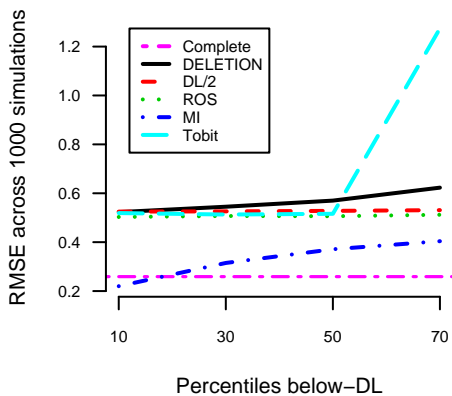**Cytokine 2, 3rd cat, n=200**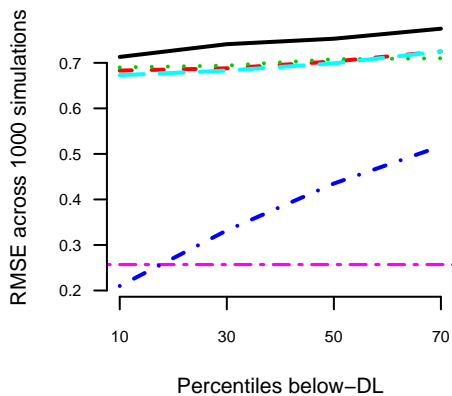**Cytokine 2, 3rd cat, n=400**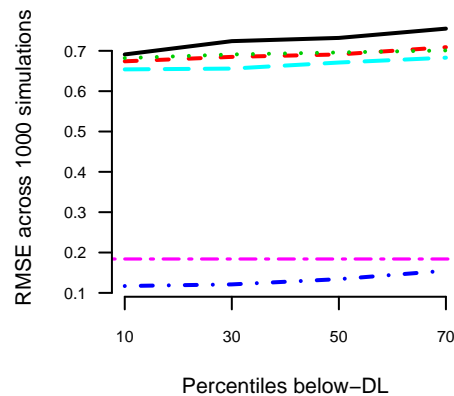**Cytokine 2, 3rd cat, n=1000**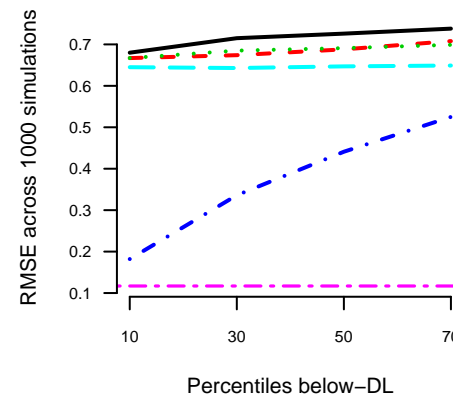

Supplement: MOESM2 [file 9428734]
